# Supplementary material for: Seasonal Rainfall Variability over Southern Ghana
Source: Preprints.org preprint supplement (doi:10.20944/preprints202108.0150.v1), 2021-08-06
Supplement: Supplementary file 1 [file supplementary]

| Stations | **trend** | **h** | **p** | **z** | **Tau** | **s** | **Var S** | **S Slope** |
| --- | --- | --- | --- | --- | --- | --- | --- | --- |
| Accra | no trend | False | 1 | 0 | 0 | 0 | 0 | 0 |
| Ada | no trend | False | 0.24 | 1.18 | 0.04 | 27 | 481 | 0 |
| Tema | no trend | False | 1 | 0 | 0 | 0 | 0 | 0 |
| Saltpond | no trend | False | 0.36 | -0.91 | -0.03 | -21 | 481 | 0 |
| Takoradi | no trend | False | 1 | 0 | 0 | 0 | 0 | 0 |
| Axim | no trend | False | 1 | 0 | 0 | 0 | 0 | 0 |
| Koforidua | no trend | False | 1 | 0 | 0 | 0 | 0 | 0 |
| Abetifi | no trend | False | 1 | 0 | 0 | 0 | 0 | 0 |
| Ho | no trend | False | 1 | 0 | 0 | 0 | 0 | 0 |
| Akim Oda | no trend | False | 1 | 0 | 0 | 0 | 0 | 0 |
| Akatsi | no trend | False | 1 | 0 | 0 | 0 | 0 | 0 |
| Akuse | no trend | False | 1 | 0 | 0 | 0 | 0 | 0 |
| Sefwi Bekwai | no trend | False | 1 | 0 | 0 | 0 | 0 | 0 |
| Kumasi | no trend | False | 1 | 0 | 0 | 0 | 0 | 0 |
| Sunyani | no trend | False | 0.101 | -1.64 | -0.05 | -37 | 481 | 0 |
| Wenchi | no trend | False | 0.171 | 1.36 | 0.04 | 31 | 481 | 0 |
| Kete Krachi | no trend | False | 1 | 0 | 0 | 0 | 0 | 0 |

Table S1: Mann Kendall Trend Analysis of Extremely Very Wet Days (R99p)
